# Supplementary material
Source: PubMed Central journal article supplement (PMC7902449)
Supplement: NIHMS1660541-supplement-Supplemental_Publication_Material.pdf [file NIHMS1660541-supplement-Supplemental_Publication_Material.pdf]

## Supplemental Material

### **Expanding Endovascular Stroke Therapy Availability While Maintaining Quality Outcomes: The Integrated Stroke System Model**

Victor Lopez-Rivera, MD,<sup>1</sup> Rania Abdelkhaleq, BA,<sup>1</sup> Sean I. Savitz, MD,<sup>1</sup> Alexandra Czap, MD,<sup>1</sup>  
Yazan Alderazi, MD,<sup>1</sup> Peng R. Chen, MD,<sup>2</sup> James C. Grotta, MD,<sup>3</sup> Spiros Blackburn, MD,<sup>2</sup> Wesley  
Jones, MD,<sup>2</sup> Gary Spiegel, MD,<sup>1</sup> Mark J. Dannenbaum, MD,<sup>2</sup> Tzu-Ching Wu, MD,<sup>1</sup> Joseph  
Cochran, MD,<sup>2</sup> Dong H. Kim, MD,<sup>2</sup> Arthur L. Day, MD,<sup>2</sup> Louise D. McCullough, MD,<sup>1</sup> Sunil A.  
Sheth, MD<sup>1</sup>

Supplemental Figure I. CONSORT DIAGRAM

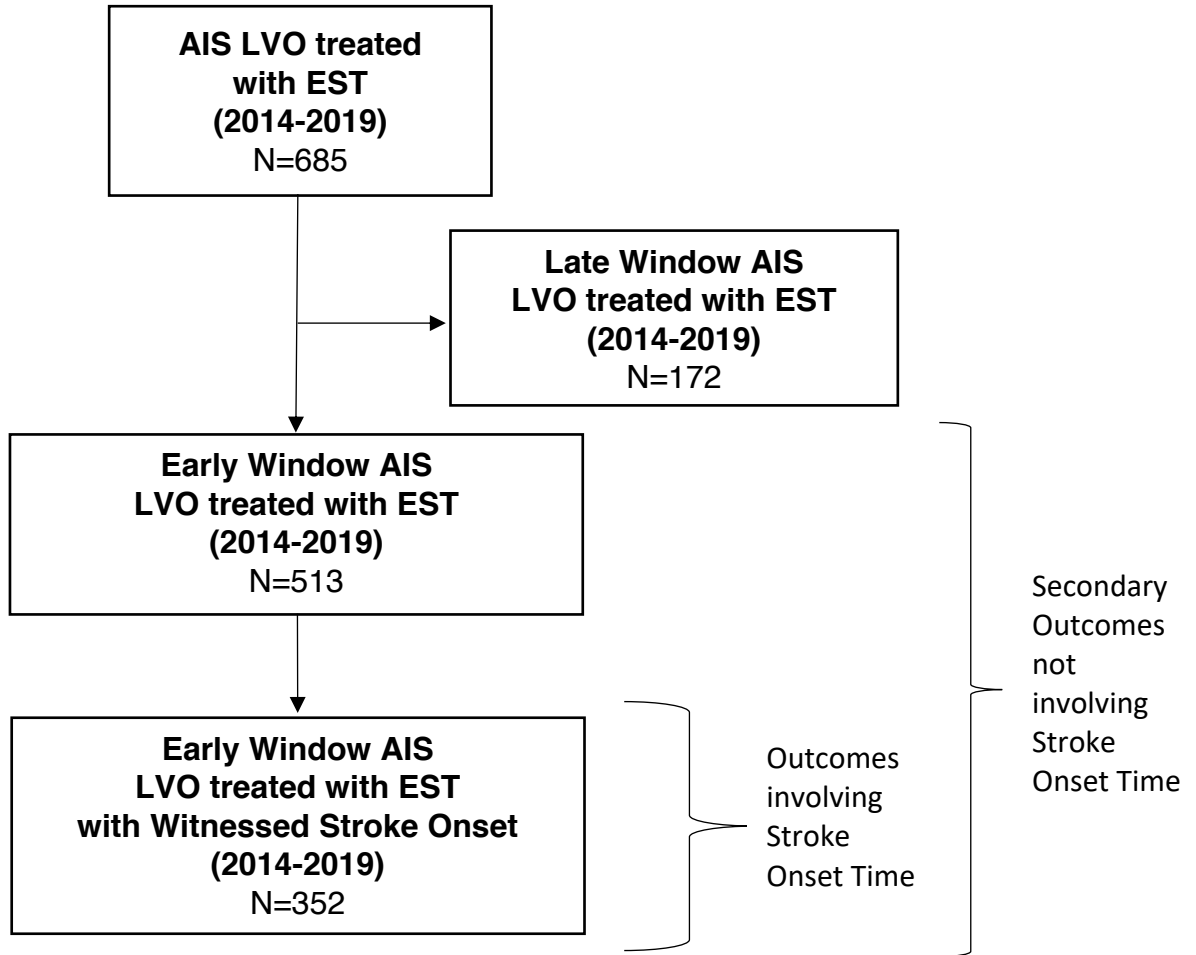

**Supplemental Figure II.** Geographic region and the location of the new EPHs.

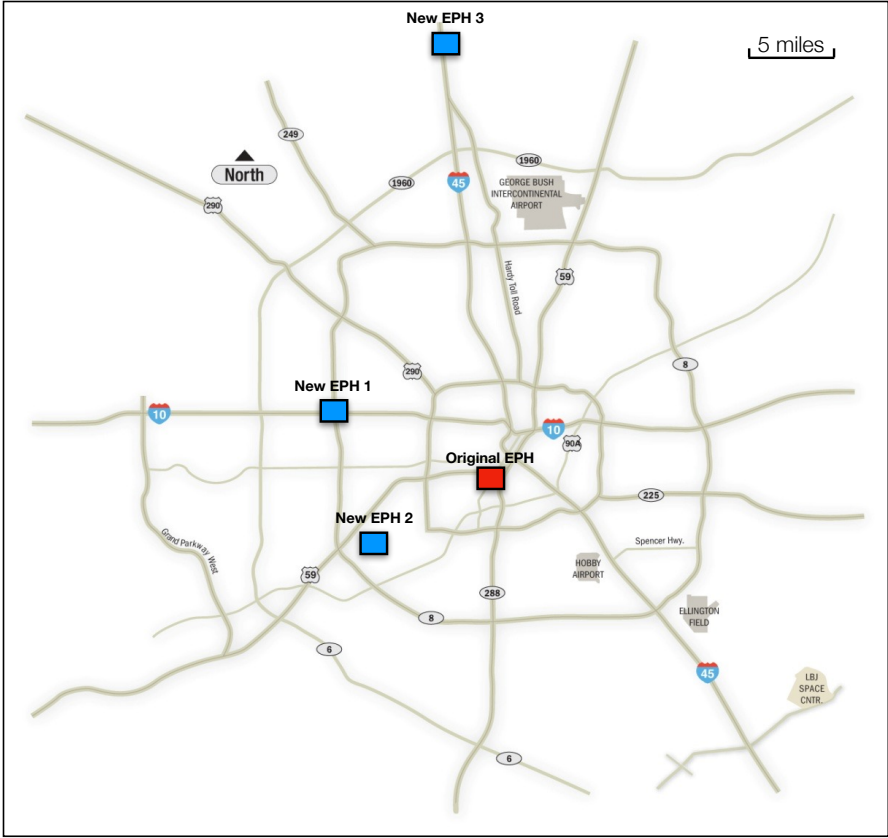

Supplemental Figure III. Total AIS and EVT volume over time.

A.

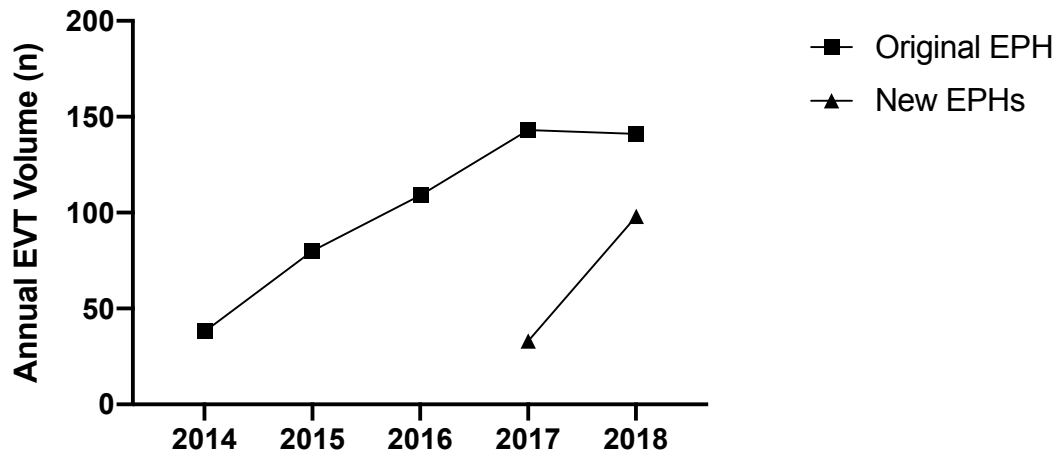

B.

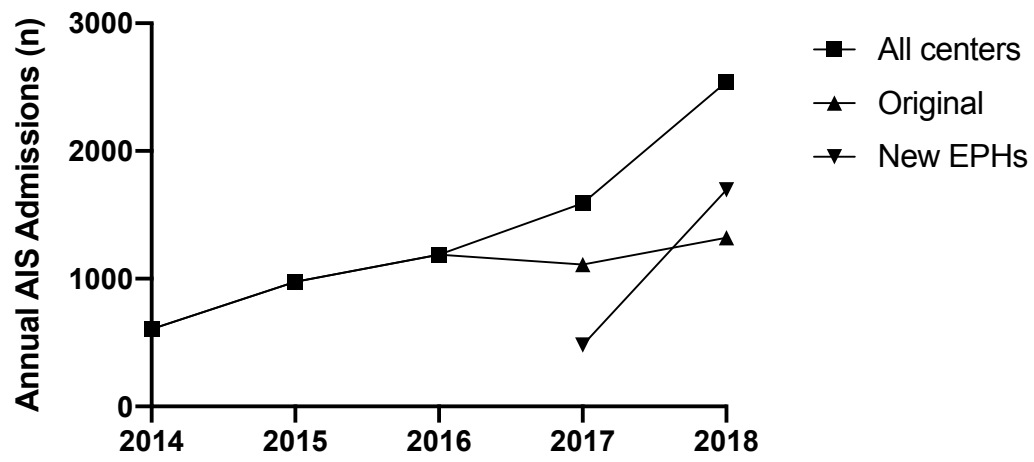

**Supplemental Table I.** Quality metrics of each EPH during the study period.

|                                                       | Original EPH<br>N=416 | New EPH-1<br>N=64* | New EPH-2<br>N=20* | New EPH-3<br>N=13* |
|-------------------------------------------------------|-----------------------|--------------------|--------------------|--------------------|
| Time from Door to Groin Puncture, mins, median [IQR]  | 102 [77-126]          | 88.5 [54.5-128.5]  | 96 [40-126.5]      | 128 [62-187]       |
| Time from Door to Recanalization, mins, median [IQR]  | 148 [114-179]         | 123 [83-166]       | 131 [96-170.5]     | 173.5 [85.5-249.5] |
| Time from Onset to Groin Puncture, mins, median [IQR] | 220 [175.5-294.5]     | 268.5 [167-329]    | 284 [208-286]      | 200 [153-232]      |
| Time from Onset to Recanalization, mins, median [IQR] | 269 [219-344]         | 276 [189-356]      | 306 [257-347]      | 270 [191-337]      |
| Successful reperfusion (mTICI 2b/3), %                | 86%                   | 94%                | 100%               | 100%               |
| PH-2 ICH                                              | 3%                    | 0%                 | 5%                 | 0%                 |
| Length of Stay, days, median [IQR]                    | 6 [3.5-10]            | 4.5 [2.5-7.5]      | 6.5 [4-9.5]        | 6 [4-12]           |
| 90d mRS 0-2, %                                        | 36%                   | 38%                | 24%                | 36%                |

\*Note that a total of 10 EST procedures were performed at the New EPHs prior to the ISS implementation.

**Supplemental Table II.** Baseline characteristics of EST patients by treating center after implementation of ISS

|                                            | Original EPH<br>N=131 | New EPHs<br>N=87 | P       |
|--------------------------------------------|-----------------------|------------------|---------|
| Age, median [IQR]                          | 65 [54-76]            | 70 [60-81]       | <0.01   |
| Age group, %                               |                       |                  | 0.570   |
| 18-40                                      | 7                     | 2                |         |
| 40-60                                      | 29                    | 19               |         |
| 60-80                                      | 68                    | 43               |         |
| 80-                                        | 27                    | 23               |         |
| Female, %                                  | 172                   | 54               | 0.081   |
| Race, %                                    |                       |                  | <0.0001 |
| White                                      | 55                    | 21               |         |
| Black or African American                  | 30                    | 9                |         |
| Asian                                      | 5                     | 4                |         |
| Hispanic or Latino, %                      | 16                    | 6                | <0.0001 |
| Past Medical History, %                    |                       |                  |         |
| Prior Stroke                               | 15                    | 4                | 0.195   |
| Atrial Fibrillation                        | 41                    | 16               | 0.227   |
| Coronary Artery Disease/Myocardial Disease | 20                    | 12               | 0.697   |
| Diabetes Mellitus                          | 41                    | 25               | 0.481   |
| Hyperlipidemia                             | 59                    | 19               | <0.05   |
| Hypertension                               | 93                    | 47               | 0.673   |
| Direct Presentation, %                     | 75                    | 58               | 0.303   |
| NIH Stroke Scale, median [IQR]             | 17 [12-22]            | 16 [11-23]       | 0.9057  |
| Receipt of IV t-PA, %                      | 93                    | 48               | <0.05   |

**Supplemental Table III.** Summary of endovascular devices used pre- and post-ISS.

| Device                       | Pre-ISS | Post-ISS |
|------------------------------|---------|----------|
| Stent Retriever              | 232     | 92       |
| Aspiration                   | 9       | 23       |
| Stent retriever + Aspiration | 30      | 103      |
| Other                        | 14      | 10       |
| Total                        | 285     | 228      |
